# Supplementary material
Source: PubMed Central journal article supplement (PMC3676868)

Supplementary Figure 1

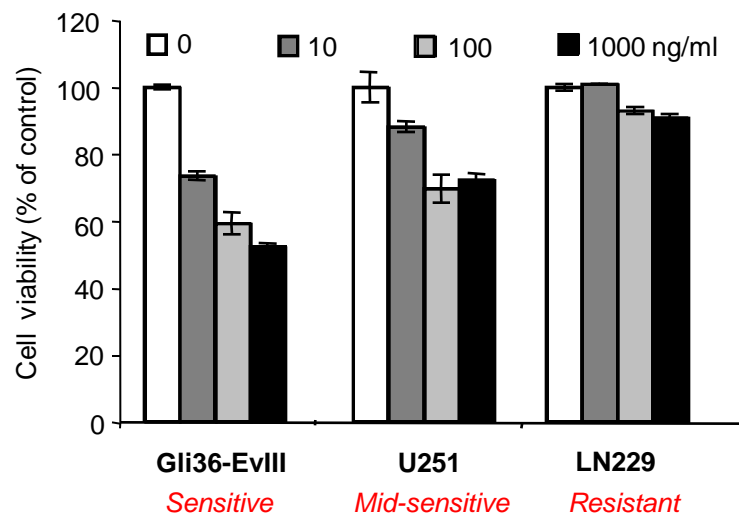

## Supplementary Figure 2

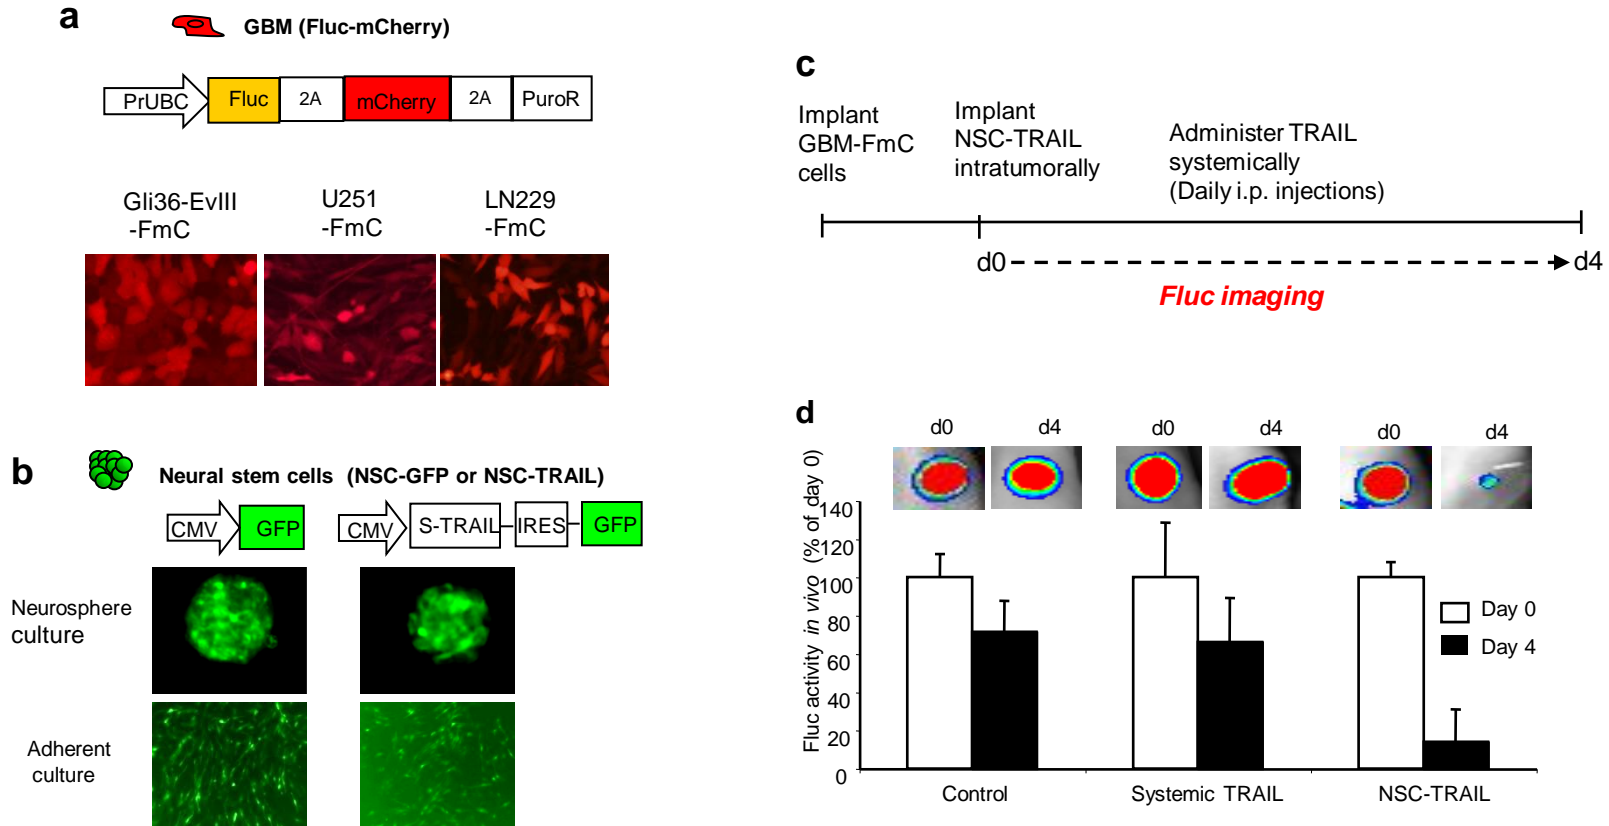

### Supplementary Figure 3

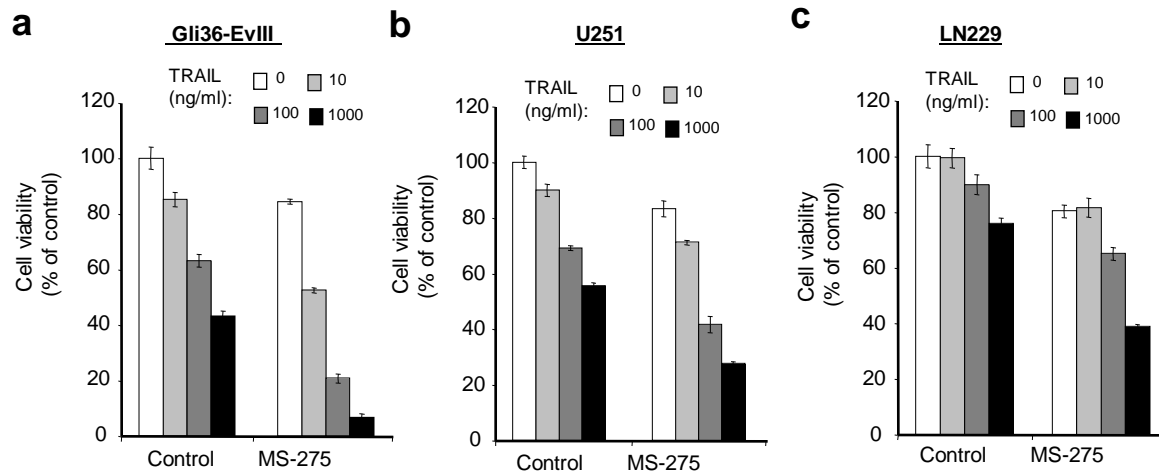

# Supplementary Figure 4

**a** Effector caspase reporter (EC-RP):

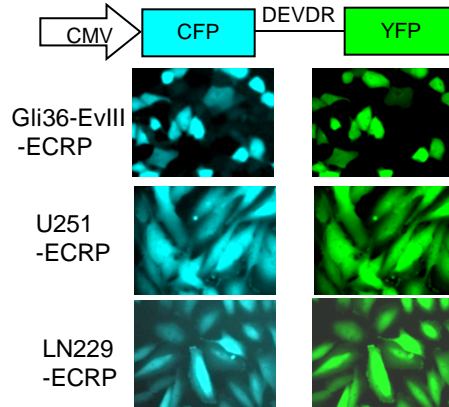

**b**

U251 cells (EC-RP)

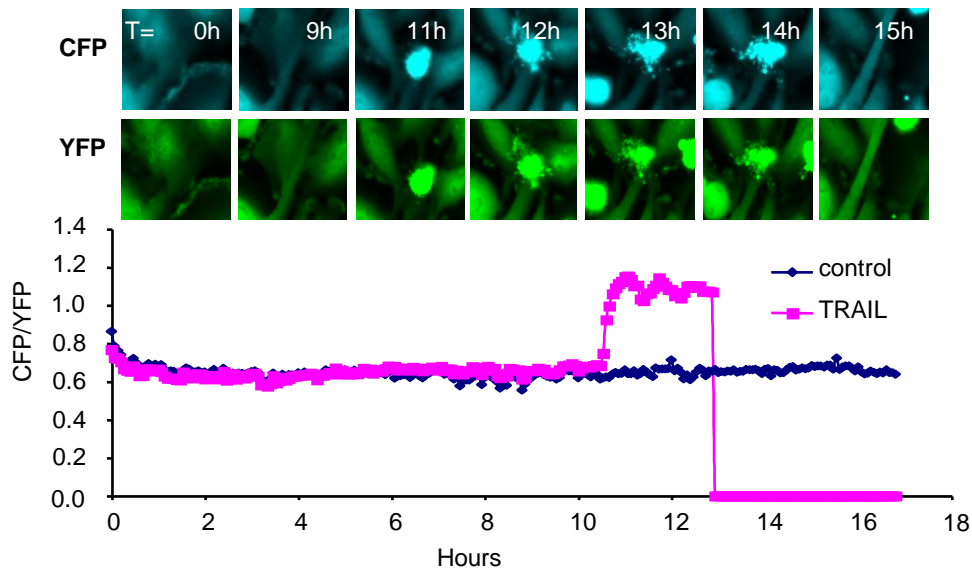

**c**

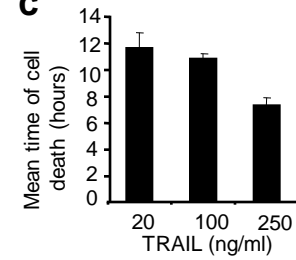

**d**

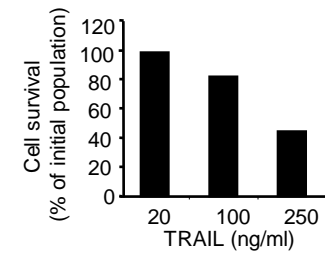

## Supplementary Figure 5

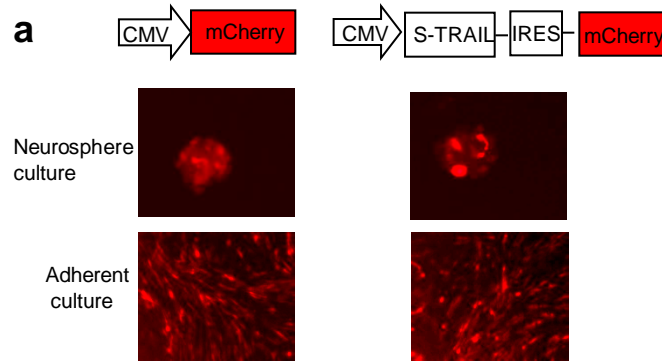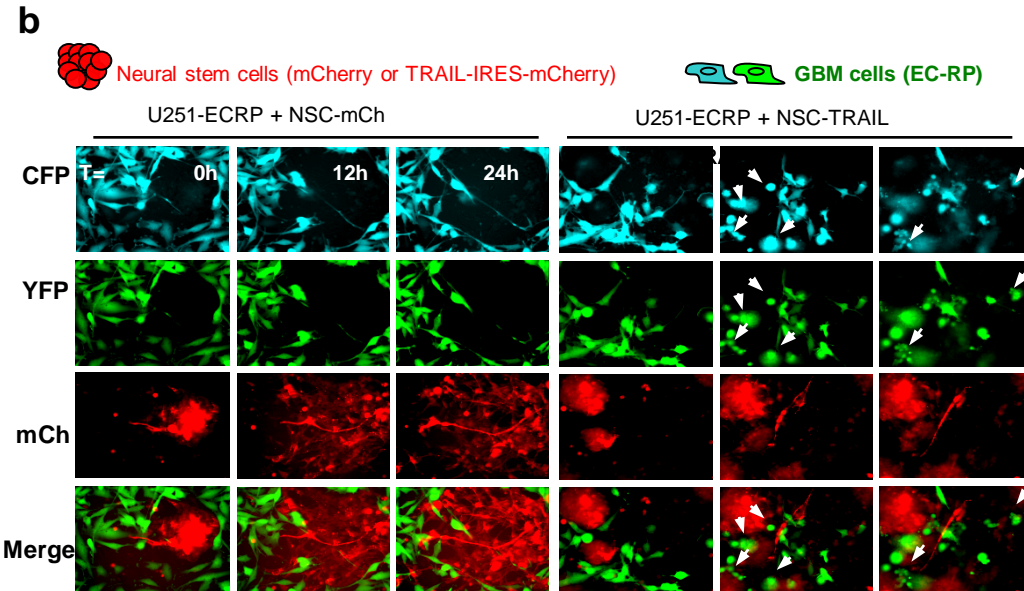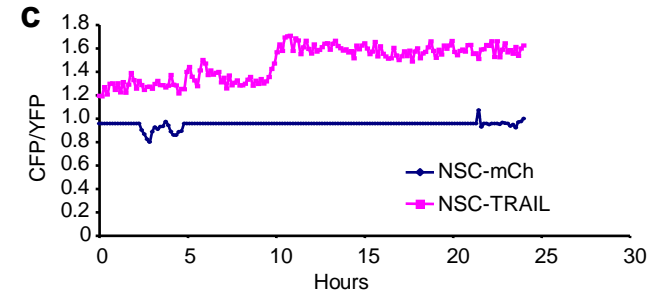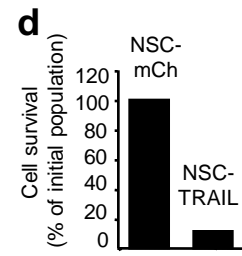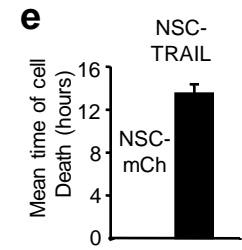

## Supplementary Figure 6

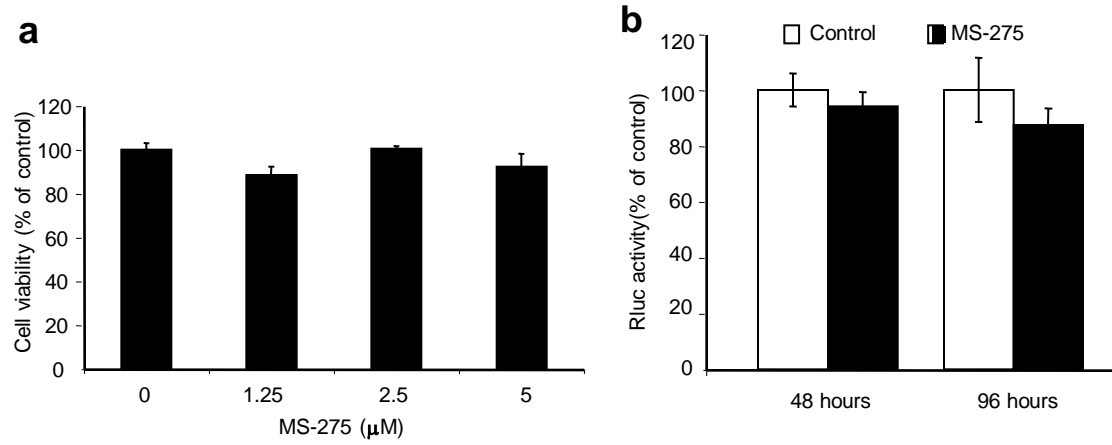

## Supplementary Figure 7

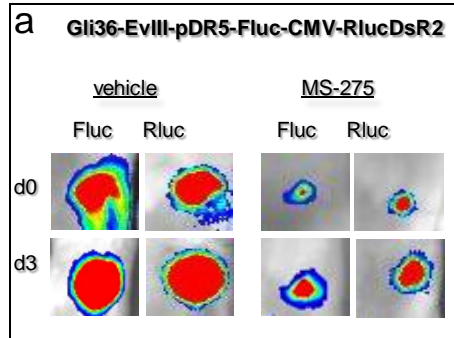

**b**

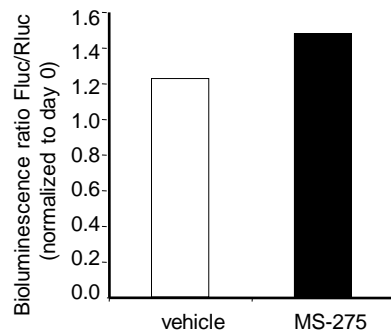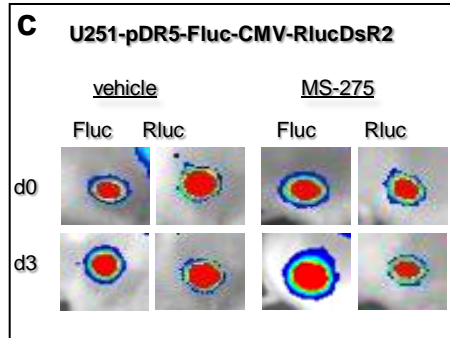

**d**

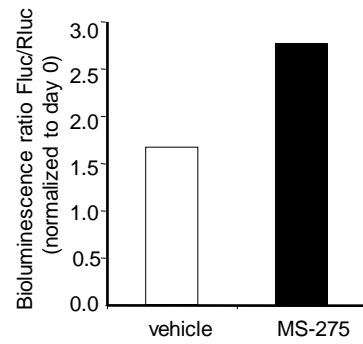

Supplement: NIHMS443746-supplement-Figures.pdf [file NIHMS443746-supplement-Figures.pdf]
